# Supplementary material
Source: publisher site journal article supplement (https://www.dovepress.com/article/193219)
Supplement: Supplementary file 1 [file get_supplementary_file.php]

**Appendix I: Search Strategy and Result**

| S.No | Database | Search terms | Number kept |
| --- | --- | --- | --- |
| 1 | PubMed | (("utilization"[Subheading] OR "utilization"[All Fields]) AND ("adolescent"[MeSH Terms] OR "adolescent"[All Fields]) AND ("reproductive health services"[MeSH Terms] OR ("reproductive"[All Fields] AND "health"[All Fields] AND "services"[All Fields]) OR "reproductive health services"[All Fields]) AND associated[All Fields] AND factors[All Fields]) OR (determinants[All Fields] AND ("Ethiopia"[MeSH Terms] OR "Ethiopia"[All Fields])) AND ("loattrfree full text"[sb] AND ("2010/01/01"[PDAT] : "2018/01/01"[PDAT])) | 33 |
| 2 | Other data bases | (("utilization"[Subheading] OR "utilization") AND ("adolescent" OR "adolescent") AND ("reproductive health services"OR ("reproductive"AND "health"AND "services") OR "reproductive health services") AND associatedAND factors) OR (determinantsAND ("Ethiopia"OR "Ethiopia")) | 0 |
| Total | |  | 33 |

**Appendix II: Studies selected for retrieval (n= 11)**

WassieNegash, MulukenDessalegn, BerhanuYitayew, Mohammed Demsie, MaeregWagnew, JosephatNyageroReproductive health service utilization and associated factors: the case of north Shewa zone youth, Amhara region, Ethiopia.PanAfr Med J. 2016; 25(Suppl 2): 3. Published online 2016 Nov 26. doi: 10.11604/pamj.supp.2016.25.2.9712 PMCID: PMC5390068

Mustafa GeletoAnsha, ChalliJiraBosho, FikruTafeseJaletaReproductive Health Services Utilization and Associated Factors Among Adolescents in Anchar District, East Ethiopia.J Family Reprod Health. 2017 Jun; 11(2): 110–118. PMCID: PMC5742664

Kim Jonas, RikCrutzen, Bart van den Borne, Priscilla Reddy Healthcare workers’ behaviors and personal determinants associated with providing adequate sexual and reproductive healthcare services in sub-Saharan Africa: a systematic review. BMC Pregnancy Childbirth. 2017; 17: 86. Published online 2017 Mar 13. doi: 10.1186/s12884-017-1268-x PMCID: PMC5348841

Gebreselassie, B. Assessment of Reproductive Health Service Utilization and Associated Factors Among Adolescents (15-19 Years Old) in Goba Town, Southeast Ethiopia. *Am. J. Heal. Res.***3,** 203 (2015)

Motuma A, Syre T, Egata G, Kenay A. Utilization of youth friendly services and associated factors among youth in Harar town, east Ethiopia: a mixed method study. BMC Health Serv Res. 2016 Jul 17;16:272. doi: 10.1186/s12913-016-1513-4. PubMed PMID: 27423332; PubMed Central PMCID: PMC4947516.

Ayehu A, Kassaw T, Hailu G. Level of Young People Sexual and Reproductive Health Service Utilization and Its Associated Factors among Young People in Awabel District, Northwest Ethiopia. PLoS One. 2016 Mar 18;11(3):e0151613. doi: 10.1371/journal.pone.0151613. eCollection 2016. PubMed PMID: 26992006; PubMed Central PMCID: PMC4798641.

Abajobir AA, Seme A. Reproductive health knowledge and services utilization among rural adolescents in east Gojjam zone, Ethiopia: a community-based cross-sectional study. BMC Health Serv Res. 2014 Mar 29;14:138. doi: 10.1186/1472-6963-14-138. PubMed PMID: 24678725; PubMed Central PMCID: PMC3986455.

Feleke SA, Koye DN, Demssie AF, Mengesha ZB. Reproductive health service utilization and associated factors among adolescents (15-19 years old) in Gondar town, Northwest Ethiopia. BMC Health Serv Res. 2013 Aug 3;13:294. doi: 10.1186/1472-6963-13-294. PubMed PMID: 23915299; PubMed Central PMCID: PMC3750465.

Kristine HusøyOnarheim, MierafTaddesse, Ole FrithjofNorheim, Muna Abdullah, Ingrid Miljeteig. Towards universal health coverage for reproductive health services in Ethiopia: two policy recommendations. Int J Equity Health. 2015; 14: 86. Published online 2015 Sep 30. doi: 10.1186/s12939-015-0218-3 PMCID: PMC4588686

[Reproductive health services utilization and its associated factors among Madawalabu University students, Southeast Ethiopia: cross-sectionalstudy](https://bmcresnotes.biomedcentral.com/articles/10.1186/s13104-015-0975-5)

Tsegay G, Edris M, Meseret S. Assessment of voluntary counseling and testing service utilization and associated factors among DebreMarkos University Students, North West Ethiopia: a cross-sectional survey in 2011. BMC Public Health. 2013;13:243.

**Appendix III: Studies not selected for retrieval (n= 22)**

TigistAlemuKassa, Tobias Luck, AssegedechBekele, Steffi G. Riedel-Heller Sexual and reproductive health of young people with disability in Ethiopia: a study on knowledge, attitude and practice: a cross-sectional study. Global Health. 2016; 12: 5. Published online 2016 Feb 10. doi: 10.1186/s12992-016-0142-3 PMCID: PMC4750354

TangutDagnew, FasilTessema, DestaHikoHealth Service Utilization and Reported Satisfaction among Adolescents in Dejen District, Ethiopia: A Cross-Sectional Study. Ethiop J Health Sci. 2015 Jan; 25(1): 17–28. PMCID: PMC4337082

SennenHounton, Aluisio J. D. Barros, AgbessiAmouzou, Solomon Shiferaw, AbdoulayeMaïga, AkanniAkinyemi, Howard Friedman, Desmond KoromaPatterns and trends of contraceptive use among sexually active adolescents in Burkina Faso, Ethiopia, and Nigeria: evidence from cross-sectional studies. Glob Health Action. 2015; 8: 10.3402/gha.v8.29737. Published online 2015 Nov 9. doi: 10.3402/gha.v8.29737 PMCID: PMC4642360

FatenDejeneTilahun, TsionAssefa, TeferaBelachewPredictors of emergency contraceptive use among regular female students at Adama University, Central Ethiopia. Pan Afr Med J. 2010; 7: 16. Published online 2010 Nov 26. PMCID: PMC3172641

Amy J Kesterton, Meena Cabral de Mello Generating demand and community support for sexual and reproductive health services for young people: A review of the Literature and Programs. Reprod Health. 2010; 7: 25. Published online 2010 Sep 24. doi: 10.1186/1742-4755-7-25 PMCID: PMC2954841

Ortiz-Echevarria L, Greeley M, Bawoke T, Zimmerman L, Robinson C, Schlecht J. Understanding the unique experiences, perspectives and sexual and reproductive health needs of very young adolescents: Somali refugees in Ethiopia. Confl Health. 2017 Nov 14;11(Suppl 1):26. doi: 10.1186/s13031-017-0129-6. eCollection 2017. PubMed PMID: 29163667; PubMed Central PMCID: PMC5688399.

Muche AA, Kassa GM, Berhe AK, Fekadu GA. Prevalence and determinants of risky sexual practice in Ethiopia: Systematic review and Meta-analysis. Reprod Health. 2017 Sep 6;14(1):113. doi: 10.1186/s12978-017-0376-4. Review. PubMed PMID: 28877736; PubMed Central PMCID: PMC5588747.

Oljira L, Berhane Y, Worku A. Pre-marital sexual debut and its associated factors among in-school adolescents in Eastern Ethiopia. BMC Public Health. 2012 May 24;12:375. doi: 10.1186/1471-2458-12-375. PubMed PMID: 22626258; PubMed Central PMCID: PMC3403867.

Centers for Disease Control and Prevention (CDC). Vital signs: teen pregnancy--United States, 1991--2009. MMWR Morb Mortal Wkly Rep. 2011 Apr 8;60(13):414-20. PubMed PMID: 21471949.

Bersamin M, Todd M, Remer L. Does distance matter? Access to family planning clinics and adolescent sexual behaviors. Matern Child Health J. 2011 Jul;15(5):652-9. doi: 10.1007/s10995-010-0618-3. PubMed PMID: 20499146; PubMed Central PMCID: PMC2943533.

Dirar A, Mengiste B, Kedir H, Godana W. Factors contributing to voluntary counseling and testing uptake among Youth in Colleges of Harar, Ethiopia. Sci J Public Health. 2013;1(2):91–6. doi:0.11648/j.sjph.20130102.17.

Tolossa E, Meshesha B, Alemu E. Assessment of level of knowledge and utilization of emergency contraception among female students of Hawassa University, South Ethiopia. AdvReprod Sci. 2013;1:51–6.

Tegegn A, Gelaw Y. Adolescet reproductive health services in Jimma city: accessibility and utilization. Ethiop J Health Sci. 2009;19(2):91–102.

Alemayehu S, Magana F, Alemayehu W. Reproductive health needs of out-of-school adolescents: A cross-sectional comparative study of rural and urban areas in northwest Ethiopia. Ethiop J Health Dev. 2006;20(1):10–17.

Frehiwot B, Yemane B, Mesganaw F. Adolescents’ health service utilization pattern and preferences. Ethiop J Health Dev. 2005;19(1):30–37.

Tilahun M, Mengistie B, Egata G, Reda AA. Health workers' attitudes toward sexual and reproductive health services for unmarried adolescents in Ethiopia.

Wegene T, Fikre E. Knowledge, attitude and practice on Emergency Contraceptives among female students at higher educations in Addis Ababa. Ethiopian Journal Health Development. 2007;21(2):111–116.

Fantahun M, Chala F, Lola M. knowledge, Attitude and practice of family planning among high school students in North Gonder. Ethiopian Medical Journal. 1995;33(1):21–29. [[PubMed](https://www.ncbi.nlm.nih.gov/pubmed/7895743)]

Ahmed A, Nugusse D. Youth reproductive health problems and service in West Harrgie Ethiopia April 29. 2004

CORHA. Assessment of the reproductive health situation/problems of the students in Addis Ababa, Bahir Dar, Jimma, and Mekele Universities, Addis Ababa, 2000

Seife M, Fikre E. Assessment of level of awareness and utilization of emergency contraception, among college female students in Oromia Regional state, Arsi Zone, Asella, South-East Ethiopia. Master thesis, AAU) 2007 Jun;

Berhane F, Berhane Y, Fantahun M. Adolescents’ health service utilization pattern and preferences: consultation for RH problems and mental stress are less likely. EJHD. 2005;19(1):29–36.

**Appendix IV: JBI Critical Appraisal Instruments**

**JBI Critical Appraisal Checklist for Studies Reporting Prevalence Data**

Reviewer                                                                                             Date

Author                                                                                                  Year                       Record Number ________________

|  | Yes | No | Unclear | Not applicable |
| --- | --- | --- | --- | --- |
| 1.         Was the sample frame appropriate to address the target population? | ? | ? | ? | ? |
| 2.         Were study participants sampled in an appropriate way? | ? | ? | ? | ? |
| 3.         Was the sample size adequate? | ? | ? | ? | ? |
| 4.         Were the study subjects and the setting described in detail? | ? | ? | ? | ? |
| 5.         Was the data analysis conducted with sufficient coverage of the identified sample? | ? | ? | ? | ? |
| 6.         Were valid methods used for the identification of the condition? | ? | ? | ? | ? |
| 7.         Was the condition measured in a standard, reliable way for all participants? | ? | ? | ? | ? |
| 8.         Was there appropriate statistical analysis? | ? | ? | ? | ? |
| 9.       Was the response rate adequate, and if not, was the low response rate managed appropriately? | ? | ? | ? | ? |

Overall appraisal:             Include   ?       Exclude   ?       Seek further info  ?

Comments (Including reason for exclusion)

© Joanna Briggs Institute 2016

**Appendix V: JBI Data Extraction Instruments**

**Data extraction form for prevalence studies**

**Citation Details**

Authors: ________________________________________________

Title: ___________________________________________________

Journal: _________________________________________________

Year: ____________________________________________________

Issue: ____________________________________________________

Volume: __________________________________________________

Pages: ___________________________________________________

**Generic Study details**

Study design: ___________________________

Country: _______________________________

Setting/Context: ___________________________________

Year/ timeframe for data collection: _________________________________

Participant Characteristics (study inclusion/exclusion information): _______________________

Condition and measurement method: _______________________________

Description of main results (n/N): __________________________________

**Appendix VI: Table of Included Studies (n= 4)**

| **Study** | **Purpose** | **Study design** | **Participants and sample size** | **Country** |
| --- | --- | --- | --- | --- |
| Abajobir AA et al 2014 | To assess level of RH knowledge and service utilization and associated factors | Community based cross sectional | 381 young people up to age of 24 years (of which 73% were adolescents 10-19 years) | Ethiopia |
| Feleke SA et al 2013 | To assess RH service (FP and VCT) utilization and associated factors | Community based cross sectional | 1290 adolescents of age group 15-19 | Ethiopia |
| Gebresilassie B. et al 2015 | To assess RH service utilization and associated factors | Community based cross sectional | 397 adolescents of age 15-19 in | Ethiopia |
| Mustafa Geleto et al 2017 | To assess RH service utilization and associated factors | Community based cross sectional | 402 adolescents of age group 15-19 years | Ethiopia |

**Appendix VII: List of Study Findings/ Conclusions (n= 4)**

| Study | Outcome Variable | Predictive Variables | | Point estimate of pooled effect size; confidence interval of the estimate, p value | | --- | |
| --- | --- | --- | --- | --- |
| Abajobir AA et al 201420 ;  Gebresilassie B. et al 201521;  Feleke SA et al 201322 ;  Mustafa Geleto et al 201723 | RH service utilization | Educational level of adolescents   - Primary - Secondary and above | OR=0.43; 95%C.I=0.32, 0.58; p<0.00001 |
| Gebresilassie B. et al 201521;  Feleke SA et al 201322 | RH, particularly FP service utilization | Schooling status of adolescents   - In-school - Out-of school | OR=2037; 95%C.I=1022, 4.61; p=0.01 |
| Abajobir AA et al 201420 ;  Gebresilassie B. et al 201521;  Feleke SA et al 201322 ;  Mustafa Geleto et al 201723 | RH/FP service utilization | Ever discussion on RH/FP issues | OR=3.76; 95%C.I=1.79, 8.92; p=0.0005 |
